# Supplementary material for: Theory-Based Digital Interventions to Improve Asthma Self-Management Outcomes: Systematic Review
Source: PubMed Central journal article supplement (PMC6306620; doi:10.2196/jmir.9666), 2018-12-12
Supplement: jmir_v20i12e293_app1.pdf [file jmir_v20i12e293_app1.pdf]

**Multimedia Appendix 1 - Search terms.** Terms within columns were combined using the Boolean 'OR' operator, terms between columns were then combined with 'AND' – i.e. papers were retrieved if the title/abstract/ keywords contained at least one term from each column.

---

|                   |                 |              |        |
|-------------------|-----------------|--------------|--------|
| digital           | adherence       | intervention | asthma |
| online            | persistence     | program*     |        |
| Internet          | engagement      | outcome      |        |
| wearable*         | self-management |              |        |
| mobile            | perception*     |              |        |
| smart             | psycholog*      |              |        |
| app               | belief*         |              |        |
| application       |                 |              |        |
| Monitor*          |                 |              |        |
| electronic        |                 |              |        |
| automated         |                 |              |        |
| feedback          |                 |              |        |
| SMS               |                 |              |        |
| text              |                 |              |        |
| IVR               |                 |              |        |
| voice recognition |                 |              |        |
| text              |                 |              |        |
| eHealth           |                 |              |        |

---

\* denotes truncation
