# Supplementary material for: Theory-Based Digital Interventions to Improve Asthma Self-Management Outcomes: Systematic Review
Source: PubMed Central journal article supplement (PMC6306620; doi:10.2196/jmir.9666), 2018-12-12
Supplement: jmir_v20i12e293_app3.pdf [file jmir_v20i12e293_app3.pdf]

**Multimedia Appendix 3 - Mode of delivery of the intervention.** EM: Electronic monitor; FD: Fully digital; FTF: face-to-face; i: individual; IVR: interactive voice response; NS: not stated; PD: partly digital; SMS: short message service.

| Study                  | FD/PD | Digital platform               | Frequency of intervention                                         | Non-digital component | Control condition                                    |
|------------------------|-------|--------------------------------|-------------------------------------------------------------------|-----------------------|------------------------------------------------------|
| Bartholomew, 2000 [54] | FD    | CD-ROM computer game           | During routine clinician's visits                                 | NS                    | Usual care                                           |
| Bartlett, 2002 [62]    | PD    | EM                             | Weekly                                                            | FTF (i)               | NS                                                   |
| Huss, 2003 [56]        | PD    | Interactive Game               | NS                                                                | FTF and telephone (i) | Usual care and computer game                         |
| Krishna, 2003 [58]     | PD    | CD-ROM                         | During routine clinician's visits                                 | FTF & paper-based (i) | Usual care                                           |
| Joseph, 2007 [57]      | FD    | Web                            | 4 sessions                                                        | NS                    | General asthma websites                              |
| Bender, 2010 [55]      | FD    | EM and IVR                     | Monthly                                                           | NS                    | NS                                                   |
| Petrie, 2012 [60]      | FD    | SMS (one-way)                  | Weeks:<br>1-6=2 SMS/day;<br>7-12=1 SMS/day;<br>13-18=3 SMS/week   | NS                    | Usual care                                           |
| Burns, 2013 [63]       | FD    | Web                            | N/A                                                               | NS                    | NS                                                   |
| Joseph, 2013 [51]      | FD    | Web                            | 4 sessions                                                        | NS                    | General asthma websites                              |
| Lau, 2015 [59]         | FD    | Web (and email reminders)      | NS                                                                | NS                    | Web page                                             |
| Wiecha, 2015 [61]      | FD    | Web                            | NS                                                                | NS                    | Asthma education manual; peak flow meter; usual care |
| Ahmed, 2016 [53]       | PD    | Web                            | Logged into portal weekly                                         | Telephone             | Usual care                                           |
| Speck, 2016 [64]       | FD    | Web (and email reminders)      | Every 3 days participants asked to log in and complete assignment | Telephone             | NS                                                   |
| Warren, 2016 [65]      | PD    | Internet-enabled mobile device | 3 days/week                                                       | Group work            | NS                                                   |
